# Supplementary material for: Chinese Domestic Ducks Evolved from Mallard Duck (Anas platyrhynchos) and Spot-Billed Duck (A. zonorhyncha)
Source: MDPI journal article supplement (doi:10.3390/ani13071156), 2023-03-24
Supplement: s1 [file s1]

**Table S1.** The proportion of individuals with each haplotype in duck populations.

| Breed (abbrev)            | Haplotype                | Proportion                               |
|---------------------------|--------------------------|------------------------------------------|
| Beijing duck (BJ)         | H3-H6                    | 25%, 50%, 12.5%, 12.5%                   |
| Chaohu duck (CH)          | H1-H16                   | 37.5%, 12.5%, 12.5%, 12.5%, 12.5%, 12.5% |
| Dayu duck (DY)            | H17-H18                  | 62.5%, 37.5%                             |
| Fengtou duck (FT)         | H4- H5, H19              | 12.5%, 75%, 12.5%                        |
| Gaoyou duck (GY)          | H5, H21-H22              | 75%, 12.5%, 12.5%                        |
| Guangxi Xiaoma duck (GX)  | H5, H14, H20             | 75%, 12.5%, 12.5%                        |
| Ji'an Red Ma duck (JA)    | H14 , H22-H26            | 12.5%, 12.5%, 25%, 25%, 12.5%, 12.5%     |
| Jinding duck (JD)         | H4-H5, H27-H28           | 12.5%, 62.5%, 12.5%, 12.5%               |
| Jingjiang Ma duck (JJ)    | H5, H22                  | 50%, 50%                                 |
| Jianshui duck (JS)        | H5, H29-H31              | 50%, 25%, 12.5%, 12.5%                   |
| Jingxi Dama duck (JX)     | H5, H32-H36              | 12.5%, 25%, 25%, 12.5%, 12.5%, 12.5%     |
| Liancheng White duck (LC) | H22, H37                 | 87.5%, 12.5%                             |
| Linwu duck (LW)           | H3, H5, H40-H42          | 25%, 12.5%, 25%, 25%, 12.5%              |
| Mawang duck (MW)          | H5, H43-H46              | 50%, 12.5%, 12.5%, 12.5%, 12.5%          |
| Putian Black duck (PT)    | H5, H47                  | 50%, 50%                                 |
| Sichuan Ma duck (SC)      | H5                       | 100%                                     |
| Sansui duck (SS)          | H5, H22, H48             | 37.5%, 37.5%, 25%                        |
| Shan Ma duck (SM)         | H5, H22, H49-H51         | 37.5%, 25%, 12.5%, 12.5%, 12.5%          |
| Taiwan duck (TW)          | H5, H21-H22, H52-H53     | 25%, 12.5%, 12.5%, 37.5%, 12.5%          |
| Youxian duck (YX)         | H5, H22, H54-H55         | 12.5%, 25%, 50%, 12.5%                   |
| Zhongshan duck (ZS)       | H5, H14, H22, H56-H58    | 12.5%, 12.5%, 12.5%, 25%, 25%, 12.5%     |
| Zongyang duck (ZY)        | H5, H8, H21-H22, H59-H60 | 12.5%, 12.5%, 12.5%, 12.5%, 37.5%, 12.5% |
| Mallard duck (LT)         | H5, H8, H38-H39          | 37.5%, 12.5%, 37.5%, 12.5%               |
| Spot-billed duck (BZ)     | H7-H10                   | 25%, 37.5%, 12.5%, 25%                   |
| White Muscovy duck (BF)   | H2                       | 100%                                     |
| Black Muscovy duck (HF)   | H1-H2                    | 75%, 25%                                 |
